# Supplementary material
Source: PubMed Central journal article supplement (PMC5752687)
Supplement: ajcr0007-2465-f7.pdf [file ajcr0007-2465-f7.pdf]

## Clinical value of SLC29A1 in hepatocellular carcinoma

**Supplementary Table 1.** Sequence of primers for qRT-PCR

| Gene           | Forward primer (5'-----3')   | Reverse primer (5'-----3')    |
|----------------|------------------------------|-------------------------------|
| <i>SLC29A1</i> | 5'-GGGTGTAGCCTCGGCATTT-3'    | 3'-CTCCACTGGCCTGCACAAG-5'     |
| <i>Actin</i>   | 5'-CTGGAACGGTGAAGGTGACA-3'   | 3'-CGGCCACATTGTGAACCTTTG-5'   |
| <i>CTNNA3</i>  | 5'-TGGGCAATACTCTGCTCTGC-3'   | 3'-TGGTAACCTGGATTATGAGAGGC-5' |
| <i>CDH4</i>    | 5'-TGGCCATCCTCATCTGCATC-3'   | 3'-GTCGTAGTCTGGTCCTCCT-5'     |
| <i>CLDN1</i>   | 5'-CTGTCATTGGGGGTGCGATA-3'   | 3'-CTGACCAAATTCGTACCTGGC-5'   |
| <i>TRIM9</i>   | 5'-TTTGCAGATTTCTGACGCC-3'    | 3'-GATAGGGGTTGCTGGGACTG-5'    |
| <i>ZEB2</i>    | 5'-CCTCTGTAGATGGTCCAGTGAA-3' | 3'-GTCCTGCGCTGAAGGTACT-5'     |
| <i>TGFBR1</i>  | 5'-TTGGTACCAAGGAAAGCCA3'     | 3'-GAGAAGTTCAGGGGCCATGT-5'    |

Abbreviations: qRT-PCR, quantitative real-time polymerase chain reaction.

**Supplementary Table 2.** The mRNA expressions of SLC-family genes in 75 patients with hepatocellular carcinoma

| Symbol   | Well | AVG $\Delta C_t$ (Ct(GOI) - Ave Ct (HKG)) |                | $2^{-\Delta C_t}$ |                | Fold Change | T-TEST<br><i>p</i> value | Fold Up- or Down-Regulation<br>HCC/para-carcinoma | Comments |
|----------|------|-------------------------------------------|----------------|-------------------|----------------|-------------|--------------------------|---------------------------------------------------|----------|
|          |      | HCC                                       | Para-carcinoma | HCC               | Para-carcinoma |             |                          |                                                   |          |
| SLC10A1  | C11  | 3.79                                      | 2.20           | 7.2E-02           | 2.2E-01        | 0.33        | N/A                      | -3.02                                             | OKAY     |
| SLC10A2  | C12  | 15.80                                     | 16.55          | 1.7E-05           | 1.0E-05        | 1.67        | N/A                      | 1.67                                              | B        |
| SLC15A1  | D01  | 6.11                                      | 6.30           | 1.4E-02           | 1.3E-02        | 1.14        | N/A                      | 1.14                                              | OKAY     |
| SLC15A2  | D02  | 10.06                                     | 9.67           | 9.4E-04           | 1.2E-03        | 0.76        | N/A                      | -1.31                                             | OKAY     |
| SLC16A1  | D03  | 4.96                                      | 4.82           | 3.2E-02           | 3.5E-02        | 0.91        | N/A                      | -1.10                                             | OKAY     |
| SLC16A2  | D04  | 5.99                                      | 5.02           | 1.6E-02           | 3.1E-02        | 0.51        | N/A                      | -1.96                                             | OKAY     |
| SLC16A3  | D05  | 15.70                                     | 16.56          | 1.9E-05           | 1.0E-05        | 1.81        | N/A                      | 1.81                                              | B        |
| SLC19A1  | D06  | 9.93                                      | 9.82           | 1.0E-03           | 1.1E-03        | 0.93        | N/A                      | -1.08                                             | OKAY     |
| SLC19A2  | D07  | 7.03                                      | 7.16           | 7.7E-03           | 7.0E-03        | 1.10        | N/A                      | 1.10                                              | OKAY     |
| SLC19A3  | D08  | 9.55                                      | 8.09           | 1.3E-03           | 3.7E-03        | 0.36        | N/A                      | -2.75                                             | OKAY     |
| SLC22A1  | D09  | 4.98                                      | 2.17           | 3.2E-02           | 2.2E-01        | 0.14        | N/A                      | -7.04                                             | OKAY     |
| SLC22A2  | D10  | 16.49                                     | 16.18          | 1.1E-05           | 1.4E-05        | 0.81        | N/A                      | -1.24                                             | B        |
| SLC22A3  | D11  | 7.97                                      | 7.80           | 4.0E-03           | 4.5E-03        | 0.89        | N/A                      | -1.12                                             | OKAY     |
| SLC22A6  | D12  | 14.13                                     | 14.46          | 5.6E-05           | 4.4E-05        | 1.26        | N/A                      | 1.26                                              | B        |
| SLC22A7  | E01  | 3.91                                      | 2.93           | 6.7E-02           | 1.3E-01        | 0.51        | N/A                      | -1.96                                             | OKAY     |
| SLC22A8  | E02  | 13.18                                     | 15.97          | 1.1E-04           | 1.6E-05        | 6.94        | N/A                      | 6.94                                              | B        |
| SLC22A9  | E03  | 4.14                                      | 4.72           | 5.7E-02           | 3.8E-02        | 1.49        | N/A                      | 1.49                                              | OKAY     |
| SLC25A13 | E04  | 4.47                                      | 4.22           | 4.5E-02           | 5.4E-02        | 0.84        | N/A                      | -1.19                                             | OKAY     |
| SLC28A1  | E05  | 9.38                                      | 7.96           | 1.5E-03           | 4.0E-03        | 0.37        | N/A                      | -2.67                                             | OKAY     |
| SLC28A2  | E06  | 10.98                                     | 10.30          | 5.0E-04           | 7.9E-04        | 0.63        | N/A                      | -1.59                                             | OKAY     |
| SLC28A3  | E07  | 13.04                                     | 10.34          | 1.2E-04           | 7.7E-04        | 0.15        | N/A                      | -6.49                                             | A        |
| SLC29A1  | E08  | 3.71                                      | 4.81           | 7.7E-02           | 3.6E-02        | 2.15        | N/A                      | 2.15                                              | OKAY     |
| SLC29A2  | E09  | 8.34                                      | 9.51           | 3.1E-03           | 1.4E-03        | 2.24        | N/A                      | 2.24                                              | OKAY     |
| SLC2A1   | E10  | 11.25                                     | 11.78          | 4.1E-04           | 2.8E-04        | 1.44        | N/A                      | 1.44                                              | OKAY     |
| SLC2A2   | E11  | 3.35                                      | 2.76           | 9.8E-02           | 1.5E-01        | 0.67        | N/A                      | -1.50                                             | OKAY     |
| SLC2A3   | E12  | 9.45                                      | 8.68           | 1.4E-03           | 2.4E-03        | 0.59        | N/A                      | -1.70                                             | OKAY     |
| SLC31A1  | F01  | 3.37                                      | 2.79           | 9.6E-02           | 1.4E-01        | 0.67        | N/A                      | -1.49                                             | OKAY     |
| SLC38A2  | F02  | 4.94                                      | 3.84           | 3.3E-02           | 7.0E-02        | 0.47        | N/A                      | -2.15                                             | OKAY     |
| SLC38A5  | F03  | 11.93                                     | 11.52          | 2.6E-04           | 3.4E-04        | 0.75        | N/A                      | -1.34                                             | OKAY     |
| SLC3A1   | F04  | 8.23                                      | 6.47           | 3.3E-03           | 1.1E-02        | 0.29        | N/A                      | -3.40                                             | OKAY     |
| SLC3A2   | F05  | 3.52                                      | 3.71           | 8.7E-02           | 7.6E-02        | 1.14        | N/A                      | 1.14                                              | OKAY     |
| SLC5A1   | F06  | 13.41                                     | 9.44           | 9.2E-05           | 1.4E-03        | 0.06        | N/A                      | -15.67                                            | A        |
| SLC5A4   | F07  | 11.47                                     | 11.79          | 3.5E-04           | 2.8E-04        | 1.25        | N/A                      | 1.25                                              | OKAY     |

## Clinical value of SLC29A1 in hepatocellular carcinoma

|         |     |       |       |         |         |      |     |       |      |
|---------|-----|-------|-------|---------|---------|------|-----|-------|------|
| SLC7A11 | F08 | 12.89 | 15.31 | 1.3E-04 | 2.5E-05 | 5.36 | N/A | 5.36  | B    |
| SLC7A5  | F09 | 9.10  | 8.36  | 1.8E-03 | 3.1E-03 | 0.60 | N/A | -1.67 | OKAY |
| SLC7A6  | F10 | 8.85  | 9.90  | 2.2E-03 | 1.0E-03 | 2.07 | N/A | 2.07  | OKAY |
| SLC7A7  | F11 | 6.69  | 5.29  | 9.7E-03 | 2.6E-02 | 0.38 | N/A | -2.65 | OKAY |
| SLC7A8  | F12 | 9.58  | 7.54  | 1.3E-03 | 5.4E-03 | 0.24 | N/A | -4.12 | OKAY |
| SLC7A9  | G01 | 5.78  | 5.92  | 1.8E-02 | 1.6E-02 | 1.11 | N/A | 1.11  | OKAY |
| SLC01A2 | G02 | 7.99  | 7.82  | 3.9E-03 | 4.4E-03 | 0.89 | N/A | -1.13 | OKAY |
| SLC01B1 | G03 | 5.00  | 3.63  | 3.1E-02 | 8.1E-02 | 0.39 | N/A | -2.57 | OKAY |
| SLC01B3 | G04 | 7.62  | 4.50  | 5.1E-03 | 4.4E-02 | 0.12 | N/A | -8.69 | OKAY |
| SLC02A1 | G05 | 9.44  | 9.82  | 1.4E-03 | 1.1E-03 | 1.30 | N/A | 1.30  | OKAY |
| SLC02B1 | G06 | 4.99  | 4.00  | 3.1E-02 | 6.2E-02 | 0.50 | N/A | -1.99 | OKAY |
| SLC03A1 | G07 | 8.13  | 8.05  | 3.6E-03 | 3.8E-03 | 0.95 | N/A | -1.06 | OKAY |
| SLC04A1 | G08 | 10.50 | 9.22  | 6.9E-04 | 1.7E-03 | 0.41 | N/A | -2.42 | OKAY |
| TAP1    | G09 | 4.34  | 4.75  | 4.9E-02 | 3.7E-02 | 1.33 | N/A | 1.33  | OKAY |
| TAP2    | G10 | 6.79  | 7.29  | 9.0E-03 | 6.4E-03 | 1.41 | N/A | 1.41  | OKAY |
| VDAC1   | G11 | 1.74  | 2.09  | 3.0E-01 | 2.4E-01 | 1.27 | N/A | 1.27  | OKAY |
| VDAC2   | G12 | 2.48  | 2.53  | 1.8E-01 | 1.7E-01 | 1.04 | N/A | 1.04  | OKAY |
| ACTB    | H01 | -1.30 | -0.92 | 2.5E+00 | 1.9E+00 | 1.30 | N/A | 1.30  | OKAY |
| B2M     | H02 | -0.15 | -1.08 | 1.1E+00 | 2.1E+00 | 0.53 | N/A | -1.90 | OKAY |
| GAPDH   | H03 | 0.00  | 0.00  | 1.0E+00 | 1.0E+00 | 1.00 | N/A | -1.00 | OKAY |
| HPRT1   | H04 | 6.73  | 6.65  | 9.4E-03 | 9.9E-03 | 0.95 | N/A | -1.05 | OKAY |
| RPLP0   | H05 | -1.60 | -1.07 | 3.0E+00 | 2.1E+00 | 1.44 | N/A | 1.44  | OKAY |

Legend: Fold-Change ( $2^{(-\Delta\Delta Ct)}$ ) is the normalized gene expression ( $2^{(-\Delta Ct)}$ ) in the Test Sample divided the normalized gene expression ( $2^{(-\Delta Ct)}$ ) in the Control Sample. Fold-Regulation represents fold-change results in a biologically meaningful way. Fold-change values greater than one indicate a positive- or an up-regulation, and the fold-regulation is equal to the fold-change. Fold-change values less than one indicate a negative or down-regulation, and the fold-regulation is the negative inverse of the fold-change. Fold-change and fold-regulation values greater than 2 are indicated in red; fold-change values less than 0.5 and fold-regulation values less than -2 are indicated in blue. *p*-values: The *p* values are calculated based on a Student's *t*-test of the replicate  $2^{(-\Delta Ct)}$  values for each gene in the control group and treatment groups, and *p* values less than 0.05 are indicated in red. Comments: A: This gene's average threshold cycle is relatively high (> 30) in either the control or the test sample, and is reasonably low in the other sample (< 30). These data mean that the gene's expression is relatively low in one sample and reasonably detected in the other sample suggesting that the actual fold-change value is at least as large as the calculated and reported fold-change result. This fold-change result may also have greater variations if *p* value > 0.05; therefore, it is important to have a sufficient number of biological replicates to validate the result for this gene. B: This gene's average threshold cycle is relatively high (> 30), meaning that its relative expression level is low, in both control and test samples, and the *p*-value for the fold-change is either unavailable or relatively high (*P* > 0.05). This fold-change result may also have greater variations; therefore, it is important to have a sufficient number of biological replicates to validate the result for this gene. C: This gene's average threshold cycle is either not determined or greater than the defined cut-off (default 35), in both samples meaning that its expression was undetected, making this fold-change result erroneous and un-interpretable.

## Clinical value of SLC29A1 in hepatocellular carcinoma

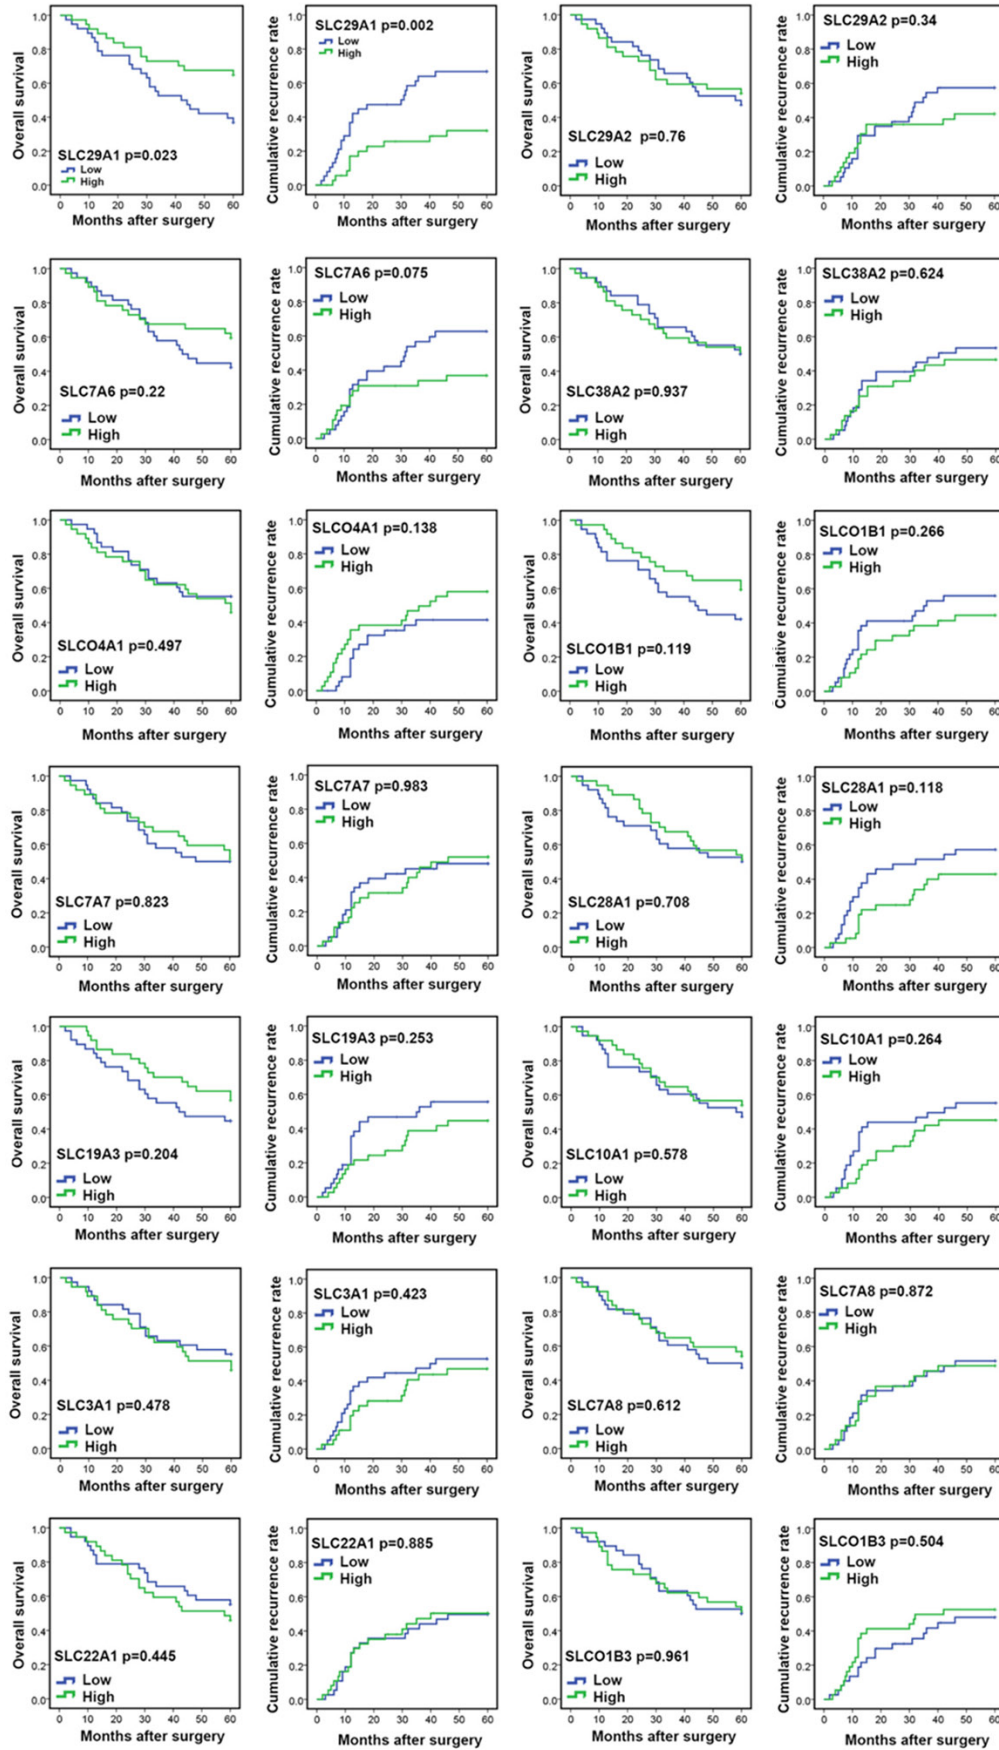

## Clinical value of SLC29A1 in hepatocellular carcinoma

**Supplementary Figure 1.** Survival and recurrence analyses of 75 patients with hepatocellular carcinoma according to *SLC01B3*, *SLC22A1*, *SLC7A8*, *SLC3A1*, *SLC10A1*, *SLC19A3*, *SLC28A1*, *SLC7A7*, *SLC01B1*, *SLC04A1*, and *SLC38A2*, *SLC7A6*, *SLC29A1*, and *SLC29A2* expression levels.

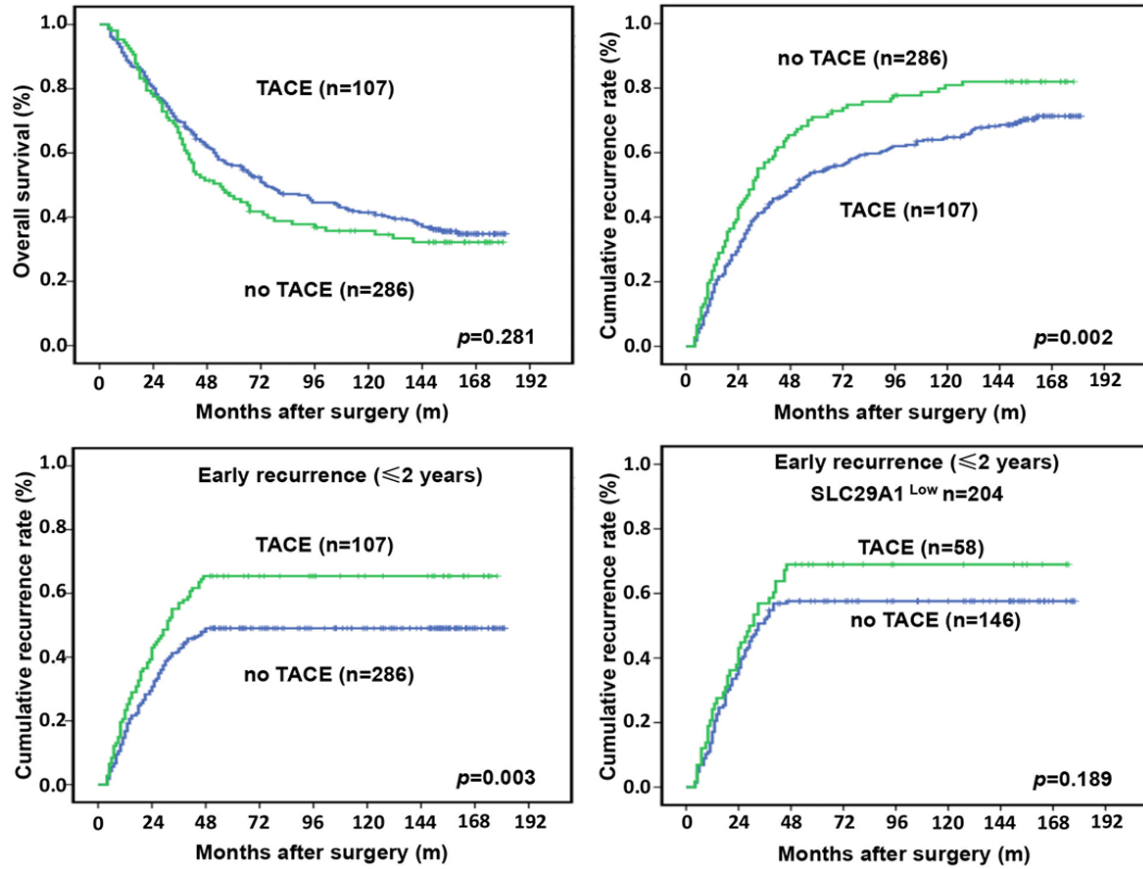

**Supplementary Figure 2.** Adjuvant transcatheter arterial chemoembolization (TACE) after surgery did not reduce the early recurrence ( $\leq 2$  year) rate, compared with no adjuvant TACE treatment.

# Clinical value of SLC29A1 in hepatocellular carcinoma

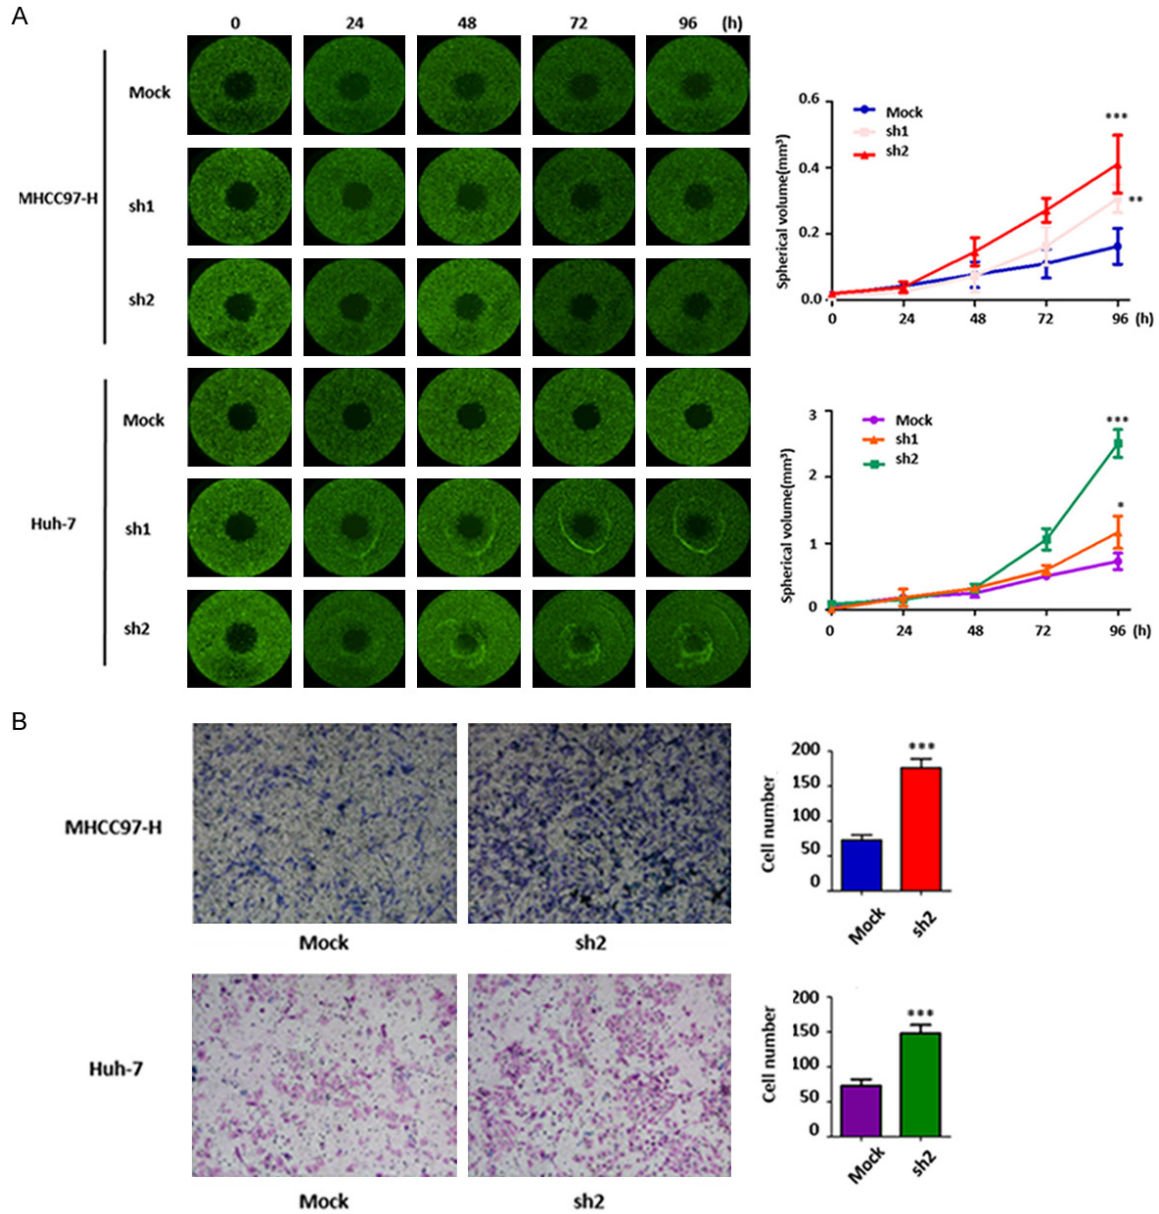

**Supplementary Figure 3.** A. Cancer cell migration was measured using an Aurora nucleic acid extraction system. B. The invasion of cancer cells was measured using transwell migration assay.
